# Supplementary material for: Crocin Attenuates NLRP3 Inflammasome Activation by Inhibiting Mitochondrial Reactive Oxygen Species and Ameliorates Monosodium Urate-Induced Mouse Peritonitis
Source: MDPI journal article supplement (doi:10.3390/cimb45030134), 2023-03-03
Supplement: s1 [file s1]

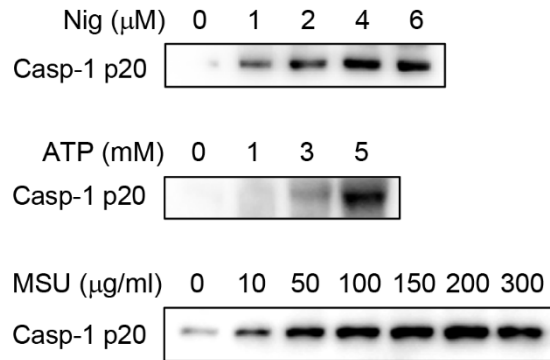

**Supplementary Figure 1.** The cleaved caspase-1 p20 levels in response to NLRP3 inflammasome triggers. LPS-primed J774A.1 cells were treated with the indicated concentration of Nigericin ( $\mu$ M) for 1 h, ATP (mM) for 1 h, and MSU ( $\mu$ g/ml) for 6h. After incubation, cell culture supernatant was precipitated and the level of cleaved caspase-1 p20 was detected by Western blot.

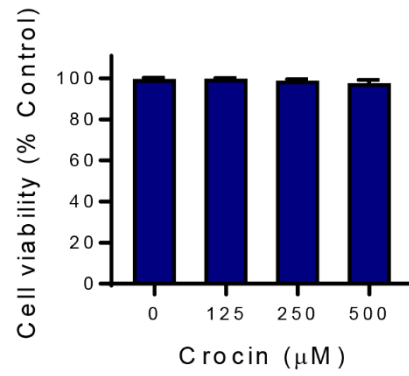

**Supplementary Figure 2.** The effect of Crocin on J774A.1 cell viability. J774A.1 cells were incubated with the indicated concentration of Crocin for 9 h, and cell viability was determined using MTT assay.
